# Supplementary material
Source: publisher site journal article supplement (https://www.dovepress.com/article/490301)
Supplement: Supplementary file 1 [file get_supplementary_file.php]

**Questionnaire on attitudes,** **behaviors, and knowledge regarding influenza vaccination**

**PART I: DEMOGRAPHIC CHARACTERISTICS**

| **No.** | **Questions** | **Answers** |
| --- | --- | --- |
|  | What is your gender? | 1. Female 2. Male |
|  | What is your age? | ………….. years |
|  | What is your job title? | 1. Doctor 2. Nurse 3. Medical Laboratory Technician 4. Radiologic Technologist 5. Parmacist 6. Other, please specify ………….. |
|  | What is your department? | 1. Internal Medicine 2. Surgical 3. Obstetrics and Gynecology 4. Pediatrics 5. Emergency 6. ENT 7. Ophthalmology 8. Stomatology 9. Medical Laboratory 10. Pharmacy 11. Radiology 12. Other, please specify ………….. |
|  | What is your professional title? | 1. None 2. Junior 3. Intermediate 4. Senior |
|  | What is your highest education level? | 1. Junior college or below 2. Bachelor degree 3. Master or PhD degree |
|  | How many years have you worked in health services? | 1. 0-9 years 2. 10-19 years 3. 20-29 years 4. ≥30 years |
|  | What proportion of your working hours is spent on direct patient interaction? | 1. ≤ 25% 2. 26%-50% 3. 51%-75% 4. ≥ 76% |

**PART II: ATTITUDES**

| **No.** | **Questions** | **Answers** |
| --- | --- | --- |
|  | Do you believe that vaccinations for healthcare professionals constitute an obligation from a professional responsibility viewpoint? | 1. Yes 2. No |
|  | Do you believe that vaccinations for healthcare professionals constitute a right and a responsibility in the defence and protection of health? | 1. Yes 2. No |
|  | Do you believe that vaccinations for healthcare professionals constitute an indispensable requirement for working in a health institution? | 1. Yes 2. No |
|  | What are your beliefs about the role of vaccinations in individual and collective human health? (**can tick more than one answer**) | 1. Vaccines are often linked to serious side effects. 2. The effects of vaccination are unknown. 3. The potential risks outweigh the potential benefits. 4. Vaccines represent a legacy of achievement in the prevention of infectious diseases. 5. Vaccines are important for reducing or eliminating serious infectious diseases. 6. It is better to “go through” the disease rather than to vaccinate against it. |
|  | Which of the following factors do you consider to be determinants of vaccination refusal/uncertainty for healthcare professionals? (**can tick more than one answer**) | 1. Mistrust of vaccines and vaccination practice 2. Scepticism, negative perception of the importance of vaccines 3. Lack of convenient access to vaccination 4. Contextual influences of a social, cultural, and economic nature 5. Other types of influences (e.g. time, cost, and lack of information) |
|  | Do you believe flu vaccination for healthcare professionals is protection for yourself? | 1. Yes 2. No |
|  | Do you believe flu vaccination for healthcare professionals is protection for your family members? | 1. Yes 2. No |
|  | Do you believe flu vaccination for healthcare professionals is protection for patients? | 1. Yes 2. No |
|  | Which of the following (common, rare, or only theoretical) side effects to some extent related to flu vaccination worry you? (**can tick more than one answer**) | 1. Pain at the injection site 2. Fever 3. Feeling of tiredness and/or fatigue 4. Diseases of the peripheral nervous system or Guillain–Barré syndrome 5. Allergic manifestations 6. No concern, the reactions are transient, minor, and very rare |
|  | Would you be in favour of mandatory flu vaccination for health workers as a fundamental requirement for working within the national health system? | 1. Yes GO TO Q19 2. No GO TO Q18a |
| 18a. | Why would you be against it? **(can tick more than one answer)** | 1. Obligation affects individual freedom of choice 2. Some people are not suitable for vaccination due to health reasons 3. Obligation would expose me to a risk I had not chosen to take |
|  | In a hospital setting, what do you think could be the best strategy to propose flu vaccination to health professionals? | 1. Make vaccination mandatory 2. Give greater visibility to the vaccination campaign 3. Award a bonus to employees who decide to get vaccinated 4. Give specific training on the topic of influenza |

**PART III: BEHAVIORS**

| **No.** | **Questions** | **Answers** |
| --- | --- | --- |
|  | Did you get flu vaccination during these periods?  (if tick ‘No’ for 2023-2024, GO TO Q20a; otherwise GO TO Q21) | |  | 1. Yes | 1. No | | --- | --- | --- | | 2021-2022 |  |  | | 2022-2023 |  |  | | 2023-2024 |  |  | |
| 20a. | Are you planning to be vaccinated against flu in 2023-2024? | 1. Yes 2. No |
|  | Have you had the flu in the past 2 years? | 1. Yes GO TO Q21a 2. No GO TO Q22 3. Don’t know GO TO Q22 |
| 21a. | If you have had the flu in the past 2 years, what action did you take? **(can tick more than one answer)** | 1. Taking flu antiviral medications 2. Taking symptomatic medications 3. Absence from work until complete recovery 4. Keep working despite of being sick 5. Return to work before complete recovery |

**PART IV: KNOWLEDGE**

| **No.** | **Questions** | **Answers** |
| --- | --- | --- |
|  | Which of the following answers is a reason for not adhering to flu vaccination? **(can tick more than one answer)** | 1. The flu vaccine is not entirely safe for health 2. The flu vaccine is not effective in preventing seasonal flu 3. The flu vaccine can cause serious side effects 4. Difficulty accessing flu vaccination 5. Cost of the vaccine |
|  | Do you believe that, given your professional activity, the risk of contracting the flu compared to the general public is: | 1. Greater than the general public 2. Less than the general public 3. Equal to the general public |
|  | The sources of influenza infection are: **(can tick more than one answer)** | 1. Healthy carriers 2. Asymptomatic carriers 3. People with flu symptoms |
|  | Which flu vaccines are currently in use in China? **(can tick more than one answer)** | 1. Attenuated 2. Inactivated 3. Split 4. Subunit |
|  | In China, flu vaccination is recommended in the following risk categories: **(can tick more than one answer)** | 1. Under 5 years old 2. 6-14 years old 3. Over 65 years old 4. Pregnant women 5. Patients with chronic diseases 6. Health worker |
|  | Which of these measures are recommended in primary flu prevention? **(can tick more than one answer)** | 1. Standard immunoglobulins 2. Specific immunoglobulins 3. Prophylactic vaccination 4. Hand washing 5. Use of medical masks by healthcare professionals 6. Use of medical masks by flu patients |
|  | The incubation period of influenza is: | 1. 6-12 h 2. 1-2 days 3. 1 week 4. 2 weeks |
|  | Influenza has a higher incidence in those aged: | 1. <15 years old 2. 15–64 years old 3. ≥65 years old |
|  | What is the most frequent complication of flu? | 1. Pneumonia 2. Myocarditis/pericarditis 3. Myositis 4. Reye syndrome 5. Encephalitis 6. Death 7. I do not know |
|  | The influenza vaccines in use protect against viruses of type: | 1. Only A 2. Only B 3. A and B 4. A, B, and C |

**THANK YOU FOR YOUR PARTICIPATION**
